# Supplementary material for: Assessing Grid Affordability for Universal Electricity Accessin Sub-Saharan Africa
Source: Research Square preprint supplement (doi:10.21203/rs.3.rs-6427206/v1), 2025-06-03
Supplement: Supplementary file 1 [file bcdef07821559a8aaf96b76b.pdf]

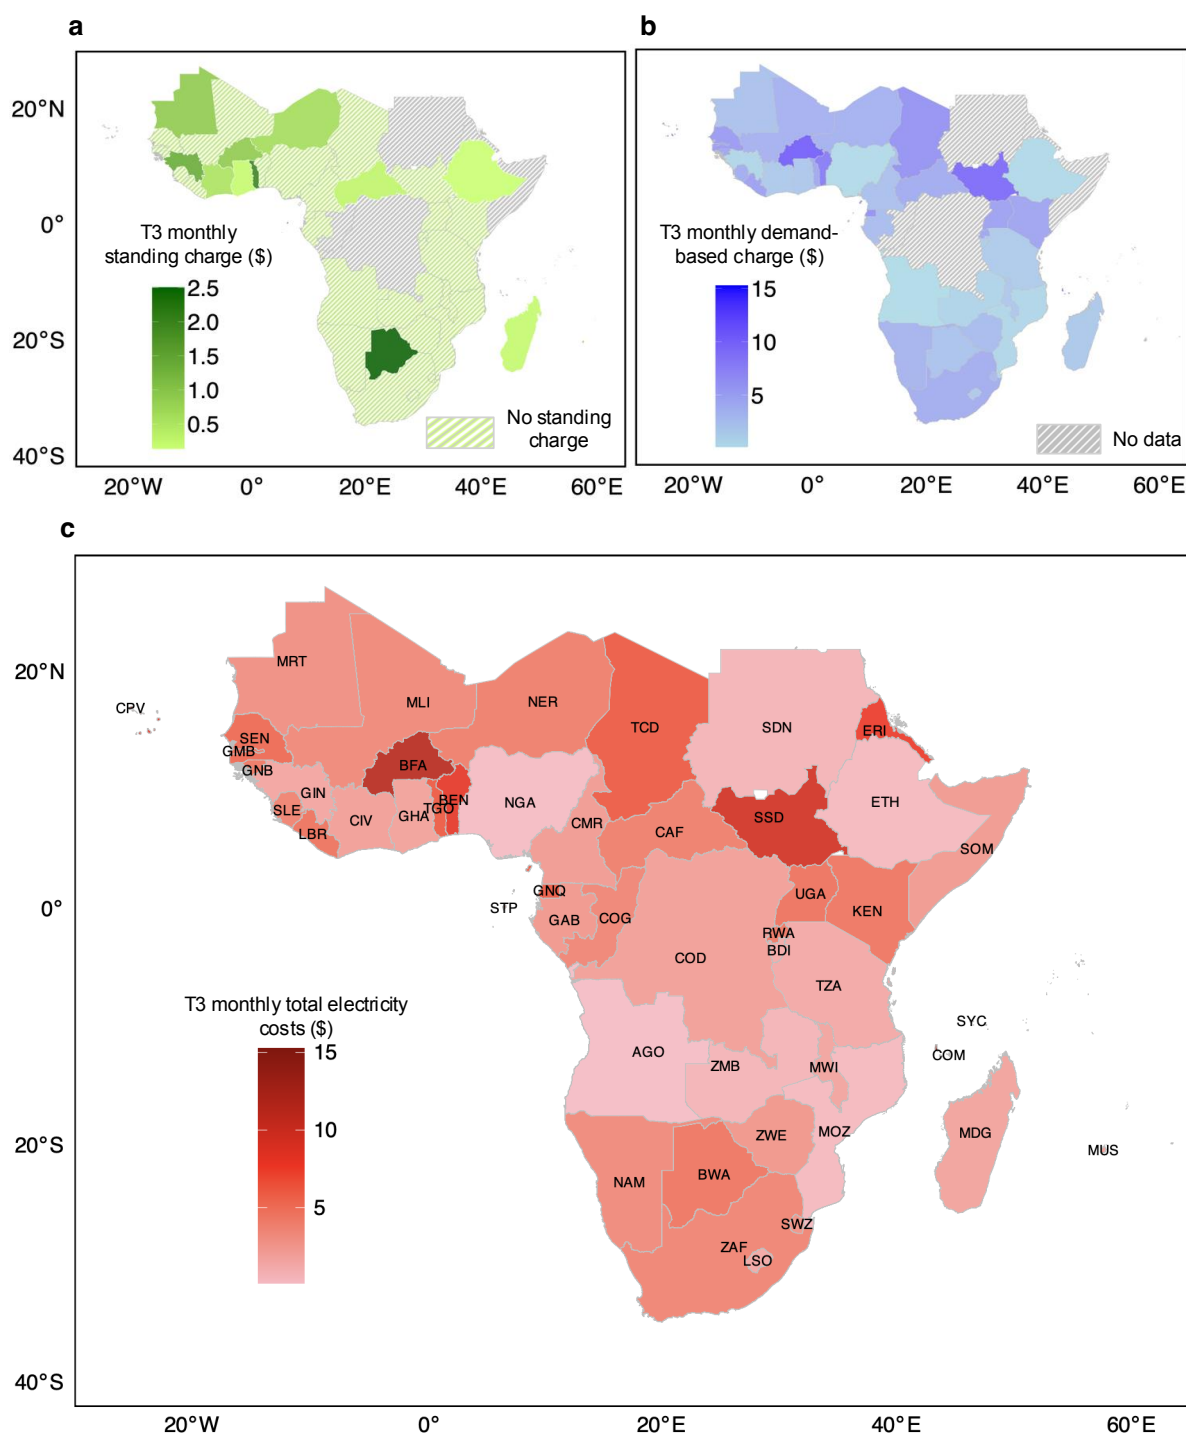

**Fig. S1: T3 monthly household electricity costs by country in US dollars (\$).** **a.** T3 household standing charge (i.e., fixed monthly fee paid by household customers). **b.** T3 household demand-based charge (i.e., any charge which is proportional to kWh, kW, kilo-volt-amperes (kVA), or amperes, related taxes, irrespective of what the charge is called). **c.** Total T3 household electricity costs. These are calculated using the data in panels a and b. For the countries with no data in a and b, represented by grey parallel lines, total costs are calculated using average household electricity cost data. Countries are referenced with ISO alpha-3 codes. In Liberia (LBR), Mali (MLI) and South Africa (ZAF), no standing charge applies under the 30kWh per month household usage due to social tariffs. For Guinea (GIN), postpaid tariffs with standing charge are shown on the map. In Namibia (NAM), common tariffs without standing charges are included, but CENORED's postpaid household tariff, which is around \$8/month, is not shown on the map, more details are provided in the Data Availability in [Methods](#).

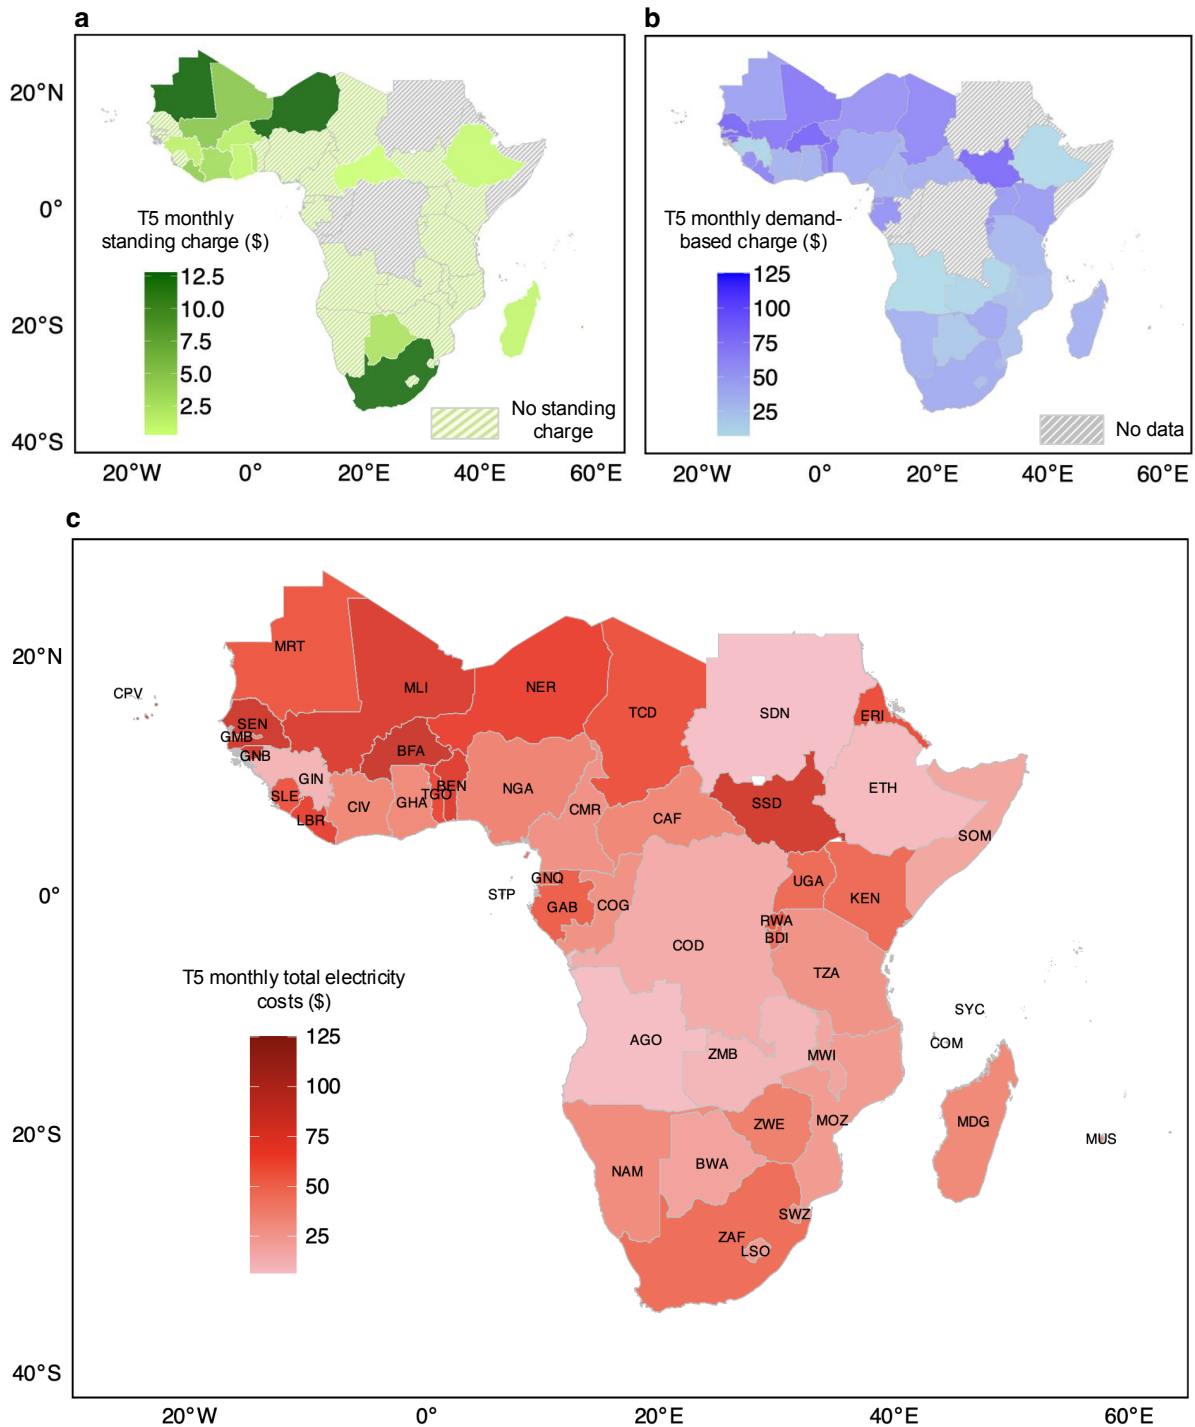

**Fig. S2: T5 monthly household electricity costs by country in US dollars (\$).** **a.** T5 household standing charge (i.e., fixed monthly fee paid by residential customers). **b.** T5 household demand-based charge (i.e., any charge which is proportional to kWh, kW, kilo-volt-amperes (kVA), or amperes, related taxes, irrespective of what the charge is called). **c.** Total T5 household electricity costs. These are calculated using the data in panels a and b. For the countries with no data in a and b, represented by grey parallel lines, total costs are calculated using average household electricity cost data. Countries are referenced with ISO alpha-3 codes. The map shows the postpaid tariff with a standing charge in Guinea (GIN) and the prepaid tariff with a standing charge in Mali (MLI), respectively. In Namibia (NAM), common tariffs without standing charges are included, but CENORED's postpaid household tariff, which is around \$8/month, is not shown on the map, more details are provided in the Data Availability in [Methods](#).

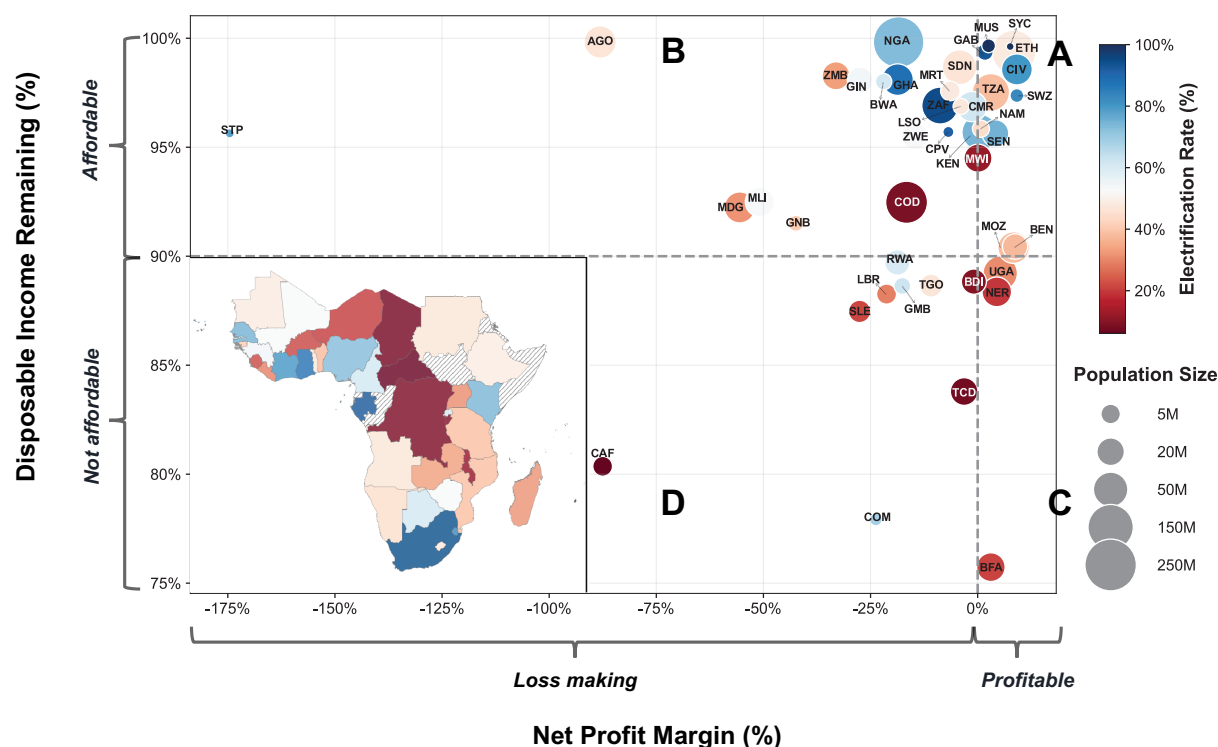

**Fig. S3: Comparison of Utility Health and Household Electricity Affordability in T3.** The x-axis represents the net profit margin of distribution power utilities or vertically integrated utilities, indicating utility health. The y-axis represents the theoretically disposable income percentage after T3 (30 kWh/month) electricity expenses, ranging from 75% to 100%. A value of 90% represents the affordability threshold defined in Methods, meaning households retain at least 90% of their income after electricity expenses. In this framework, the four quadrants help illustrate different electricity access challenges and opportunities: The top-right quadrant (A) of the separator range represents grid electrification opportunity; The top-left quadrant (B) indicates utility stress; The bottom-right quadrant (C) reflects affordability stress; and the bottom-left quadrant (D) signifies a grid electrification trap. Net profit margin data is unavailable for Equatorial Guinea, Eritrea, Republic of the Congo, Somalia, and South Sudan, denoted with parallel lines in the inset Africa map. Countries are labelled with ISO alpha-3 codes.

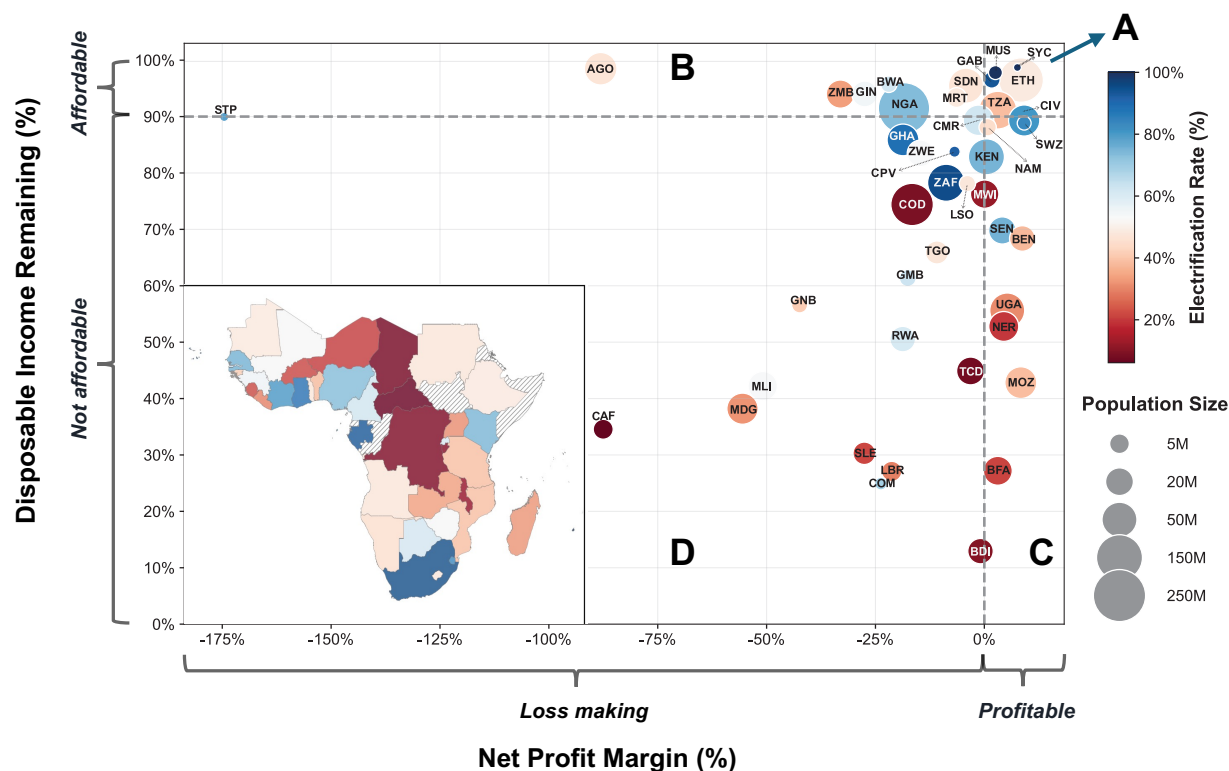

**Fig. S4: Comparison of Utility Health and Household Electricity Affordability in T4 (included outliers).** The x-axis represents the net profit margin of distribution power utilities or vertically integrated utilities, indicating utility health. The y-axis represents the theoretically disposable income percentage after T4 (102 kWh/month) electricity expenses, ranging from 0% to 100%. A value of 90% represents the affordability threshold defined in Methods, meaning households retain at least 90% of their income after electricity expenses. In this framework, the four quadrants help illustrate different electricity access challenges and opportunities: The top-right quadrant (A) of the separator range represents grid electrification opportunity; The top-left quadrant (B) indicates utility stress; The bottom-right quadrant (C) reflects affordability stress; and the bottom-left quadrant (D) signifies a grid electrification trap. Net profit margin data is unavailable for Equatorial Guinea, Eritrea, Republic of the Congo, Somalia, and South Sudan, denoted with parallel lines in the inset Africa map. Countries are labelled with ISO alpha-3 codes.

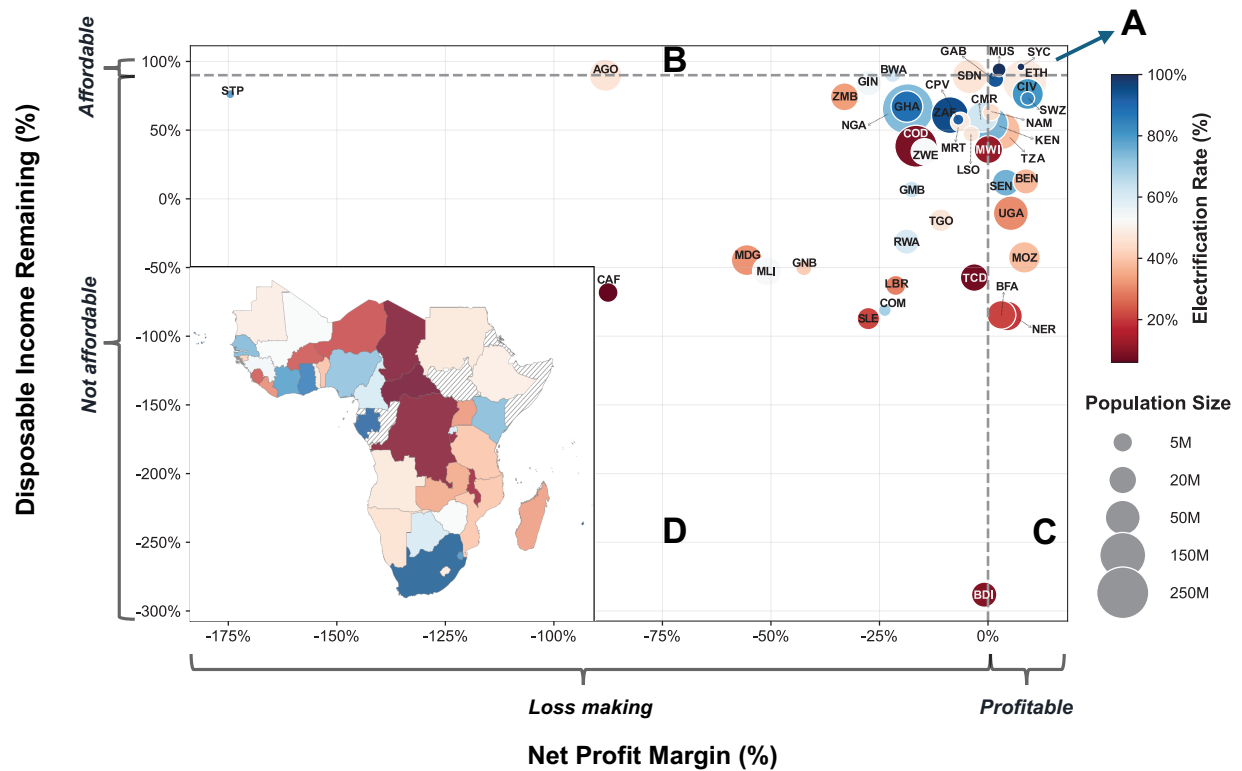

**Fig. S5: Comparison of Utility Health and Household Electricity Affordability in Tier 5.** The x-axis represents the net profit margin of distribution power utilities or vertically integrated utilities, indicating utility health. The y-axis represents the theoretically disposable income percentage after T5 (246 kWh/month) electricity expenses, ranging from -300% to 100%. A value of 90% represents the affordability threshold defined in Methods, meaning households retain at least 90% of their income after electricity expenses. In this framework, the four quadrants help illustrate different electricity access challenges and opportunities: The top-right quadrant (A) of the separator range represents grid electrification opportunity; The top-left quadrant (B) indicates utility stress; The bottom-right quadrant (C) reflects affordability stress; and the bottom-left quadrant (D) signifies a grid electrification trap. Net profit margin data is unavailable for Equatorial Guinea, Eritrea, Republic of the Congo, Somalia, and South Sudan, denoted with parallel lines in the inset Africa map. Countries are labelled with ISO alpha-3 codes.

| Country | Tier 4 Electricity Affordable Population (%) | Tier 5 Electricity Affordable Population (%) |
|---------|----------------------------------------------|----------------------------------------------|
| AGO     | 100                                          | 67                                           |
| BDI     | 1                                            | < 1                                          |
| BEN     | 6                                            | 1                                            |
| BFA     | 1                                            | < 1                                          |
| BWA     | 90                                           | 70                                           |
| CAF     | 3                                            | 1                                            |
| CPV     | 57                                           | 15                                           |
| CMR     | 61                                           | 8                                            |
| COD     | 23                                           | 4                                            |
| COG     | 52                                           | 19                                           |
| COM     | 3                                            | 1                                            |
| CIV     | 40                                           | 7                                            |
| ERI     | 1                                            | < 1                                          |
| ETH     | 98                                           | 39                                           |
| GAB     | 97                                           | 48                                           |
| GHA     | 48                                           | 14                                           |
| GIN     | 89                                           | 27                                           |
| GMB     | 6                                            | 1                                            |
| GNB     | 2                                            | 1                                            |
| GNQ     | 62                                           | 27                                           |
| KEN     | 33                                           | 4                                            |
| LBR     | 1                                            | < 1                                          |
| LSO     | 29                                           | 6                                            |
| MDG     | 3                                            | 1                                            |
| MLI     | 1                                            | < 1                                          |
| MOZ     | 9                                            | 1                                            |
| MRT     | 84                                           | 2                                            |
| MUS     | 100                                          | 86                                           |
| MWI     | 19                                           | 2                                            |
| NAM     | 65                                           | 28                                           |
| NER     | 1                                            | < 1                                          |
| NGA     | 71                                           | 5                                            |
| RWA     | 6                                            | 1                                            |
| SDN     | 94                                           | 56                                           |
| SEN     | 9                                            | 1                                            |
| SLE     | 1                                            | < 1                                          |
| SOM     | 14                                           | 1                                            |
| SSD     | 5                                            | 1                                            |
| STP     | 63                                           | 21                                           |
| SWZ     | 65                                           | 32                                           |
| SYC     | 100                                          | 97                                           |
| TCD     | 2                                            | 1                                            |
| TGO     | 8                                            | 1                                            |
| TZA     | 69                                           | 4                                            |
| UGA     | 7                                            | 1                                            |
| ZAF     | 48                                           | 31                                           |
| ZMB     | 83                                           | 30                                           |
| ZWE     | 46                                           | 7                                            |

**Table S1: Electricity Affordability for Tier 4 & 5 by Population Across Countries.** Affordability threshold: 10% of income spent on electricity. The population percentage represents the share of the country's population that can afford electricity within this threshold at each tier based on the income distribution modelling, affordability calculation and assessment methods. Countries are referenced with ISO alpha-3 codes.

| Country | Tier 1 (%) | Tier 2 (%) | Tier 3 (%) | Tier 4 (%) | Tier 5 (%) |
|---------|------------|------------|------------|------------|------------|
| AGO     | 0.002054   | 0.034229   | 0.171145   | 1.516229   | 10.052614  |
| BDI     | 0.133988   | 2.233131   | 11.165657  | 87.055816  | 388.147296 |
| BEN     | 0.112580   | 1.229276   | 9.554171   | 31.616168  | 87.313670  |
| BFA     | 4.848470   | 6.687084   | 24.265137  | 72.806171  | 184.446504 |
| BWA     | 1.051949   | 1.230307   | 1.989276   | 4.266185   | 9.358037   |
| CAF     | 1.505359   | 4.955724   | 19.638127  | 65.444436  | 168.204048 |
| CMR     | 0.037621   | 0.627014   | 3.135068   | 10.659230  | 40.486201  |
| COD     | 0.090309   | 1.505142   | 7.525710   | 25.587412  | 61.710818  |
| COG     | 0.049287   | 0.821451   | 4.107257   | 13.964673  | 33.679505  |
| COM     | 0.265000   | 4.416665   | 22.083326  | 75.083310  | 181.083276 |
| CPV     | 0.051601   | 0.860012   | 4.300059   | 16.221632  | 42.352536  |
| ERI     | 0.242611   | 4.043518   | 20.217589  | 68.739801  | 165.784226 |
| ETH     | 0.210369   | 0.292117   | 0.639982   | 3.527983   | 14.445024  |
| GAB     | 0.007619   | 0.126989   | 0.634945   | 3.488548   | 12.998147  |
| GHA     | 0.200834   | 0.523800   | 1.898125   | 14.137900  | 32.815493  |
| GIN     | 0.783276   | 0.997696   | 1.910121   | 5.983403   | 15.810443  |
| GMB     | 0.136347   | 2.272449   | 11.362245  | 38.631632  | 93.170408  |
| GNB     | 0.101869   | 1.697819   | 8.489097   | 43.395703  | 150.260503 |
| GNQ     | 0.039804   | 0.663404   | 3.317018   | 11.277860  | 27.199544  |
| KEN     | 0.051789   | 0.863143   | 4.315715   | 17.135444  | 45.550716  |
| LBR     | 0.140849   | 2.347490   | 11.737449  | 72.915642  | 163.059252 |
| LSO     | 0.037574   | 0.626237   | 3.131186   | 21.874735  | 52.756714  |
| MDG     | 0.876923   | 1.593815   | 7.761285   | 61.795945  | 144.620808 |
| MLI     | 0.090134   | 1.502236   | 7.511178   | 57.791007  | 152.630333 |
| MOZ     | 0.115258   | 1.920970   | 9.604848   | 57.180284  | 142.612875 |
| MRT     | 0.685709   | 1.015044   | 2.416466   | 6.620734   | 44.037049  |
| MUS     | 0.109451   | 0.151790   | 0.346762   | 2.202298   | 6.026731   |
| MWI     | 0.066029   | 1.100490   | 5.502448   | 23.748506  | 64.117686  |
| NAM     | 0.816552   | 1.456001   | 4.150083   | 11.895184  | 36.969853  |
| NER     | 1.552868   | 3.471326   | 11.634980  | 47.213588  | 185.282827 |
| NGA     | 0.002179   | 0.036309   | 0.181546   | 8.530979   | 34.672145  |
| RWA     | 0.073007   | 1.216779   | 10.287939  | 49.452743  | 131.154699 |
| SDN     | 0.015936   | 0.265608   | 1.328038   | 4.515329   | 10.889910  |
| SEN     | 0.057688   | 0.961459   | 5.865040   | 30.192927  | 88.239515  |
| SLE     | 0.123290   | 2.054837   | 12.532250  | 69.706406  | 187.200953 |
| SOM     | 0.085784   | 1.429731   | 7.148655   | 24.305427  | 58.618971  |
| SSD     | 0.187091   | 3.118191   | 15.590953  | 53.075023  | 132.648087 |
| SWZ     | 0.031543   | 0.525721   | 2.628607   | 11.171760  | 26.943656  |
| SYC     | 0.004569   | 0.076157   | 0.380787   | 1.294675   | 3.950710   |
| TCD     | 0.194496   | 3.241601   | 16.208003  | 55.107209  | 157.312968 |
| TGO     | 3.623195   | 5.100193   | 11.350098  | 34.094769  | 115.633906 |
| TZA     | 0.029815   | 0.496913   | 2.484564   | 8.861611   | 50.602285  |
| UGA     | 0.061834   | 1.030561   | 10.783785  | 44.369066  | 110.483234 |
| ZAF     | 0.037053   | 0.617552   | 3.087761   | 21.734309  | 39.061859  |
| ZMB     | 0.020660   | 0.344339   | 1.721693   | 6.012882   | 25.734091  |
| ZWE     | 0.053949   | 0.899157   | 4.495787   | 16.522057  | 65.713416  |

**Table S2: Average Affordability by Country and Energy Tier.** Affordability is calculated based on the share of electricity bills at each tier relative to household income based on the affordability calculation method. Countries are referenced with ISO alpha-3 codes.

| Country | Monthly Demand by Households (kWh) | Energy Tier |
|---------|------------------------------------|-------------|
| AGO     | 127.79                             | Tier 4      |
| BDI     | 16.02                              | Tier 2      |
| BEN     | 5.76                               | Tier 1      |
| BFA     | 9.53                               | Tier 2      |
| BWA     | 255.29                             | Tier 5      |
| CAF     | 12.99                              | Tier 2      |
| CIV     | 57.41                              | Tier 3      |
| CMR     | 36.20                              | Tier 3      |
| COD     | 5.53                               | Tier 1      |
| COG     | 50.35                              | Tier 3      |
| COM     | 19.42                              | Tier 2      |
| CPV     | 261.41                             | Tier 5      |
| ERI     | 27.81                              | Tier 2      |
| ETH     | 20.65                              | Tier 2      |
| GAB     | 145.26                             | Tier 4      |
| GHA     | 57.93                              | Tier 3      |
| GIN     | 29.48                              | Tier 2      |
| GMB     | 94.31                              | Tier 3      |
| GNB     | 10.26                              | Tier 2      |
| GNQ     | 259.98                             | Tier 5      |
| KEN     | 19.22                              | Tier 2      |
| LBR     | 17.05                              | Tier 2      |
| LSO     | 83.54                              | Tier 3      |
| MDG     | 8.22                               | Tier 2      |
| MLI     | 101.16                             | Tier 3      |
| MOZ     | 18.56                              | Tier 2      |
| MRT     | 145.41                             | Tier 4      |
| MUS     | 348.28                             | Tier 5      |
| MWI     | 17.24                              | Tier 2      |
| NAM     | 174.28                             | Tier 4      |
| NER     | 18.96                              | Tier 2      |
| NGA     | 24.20                              | Tier 2      |
| RWA     | 3.91                               | Tier 1      |
| SDN     | 83.77                              | Tier 3      |
| SEN     | 132.26                             | Tier 4      |
| SLE     | 35.09                              | Tier 3      |
| SOM     | 14.39                              | Tier 2      |
| SSD     | 5.99                               | Tier 1      |
| STP     | 101.51                             | Tier 4      |
| SWZ     | 389.77                             | Tier 5      |
| SYC     | 1045.65                            | Tier 5      |
| TCD     | 1.73                               | Tier 1      |
| TGO     | 16.94                              | Tier 2      |
| TZA     | 17.58                              | Tier 2      |
| UGA     | 8.81                               | Tier 2      |
| ZAF     | 313.64                             | Tier 5      |
| ZMB     | 114.16                             | Tier 4      |
| ZWE     | 37.59                              | Tier 3      |

**Table S3: Actual Monthly Electricity Demand per Household by Country and Identified Tier.** The result is derived using household electricity demand methods. Energy tiers are identified based on the MTF framework, as detailed in Table 1 of the main paper. Countries are referenced with ISO alpha-3 codes. In 18 countries, the estimated monthly electricity demand by households may be overestimated, as the reported data represent national averages that include demand from industrial, transportation, commercial, and public service sectors. These countries include: BDI, CAF, CPV, COM, GNQ, SWZ, GMB, GIN, GNB, LSO, LBR, MWI, MLI, MRT, SYC, SLE, SOM, and STP.



| Household Appliance                 | Min Power (W) | Max Power (W) |
|-------------------------------------|---------------|---------------|
| Window air conditioner <sup>?</sup> | 900           | 1440          |
| Refrigerator <sup>?</sup>           | 300           | 800           |
| Electric cookstove <sup>?</sup>     | 1000          | 3000          |
| Vacuum cleaner <sup>?</sup>         | 600           | 2000          |
| LED lighting <sup>?</sup>           | 10            | 10            |
| Washing machine <sup>?</sup>        | 400           | 1400          |
| Microwave <sup>?</sup>              | 600           | 1000          |
| Oven <sup>?</sup>                   | 2000          | 5000          |
| Electric water heating <sup>?</sup> | 2000          | 4000          |
| TV <sup>?</sup>                     | 50            | 200           |
| Laptop <sup>?</sup>                 | 30            | 70            |
| <b>Sum</b>                          | 7890          | 18920         |

**Table S4: Maximum Possible Peak Demand for Energy Tier 5 Household Appliances.** We assume all listed appliances in a Tier 5 household are used simultaneously and calculate the maximum possible peak demand before diversity.
